# Supplementary material
Source: PubMed Central journal article supplement (PMC5986200)
Supplement: supp_RA118.001761_135088_1_supp_117111_p70435.pdf [file supp_RA118.001761_135088_1_supp_117111_p70435.pdf]

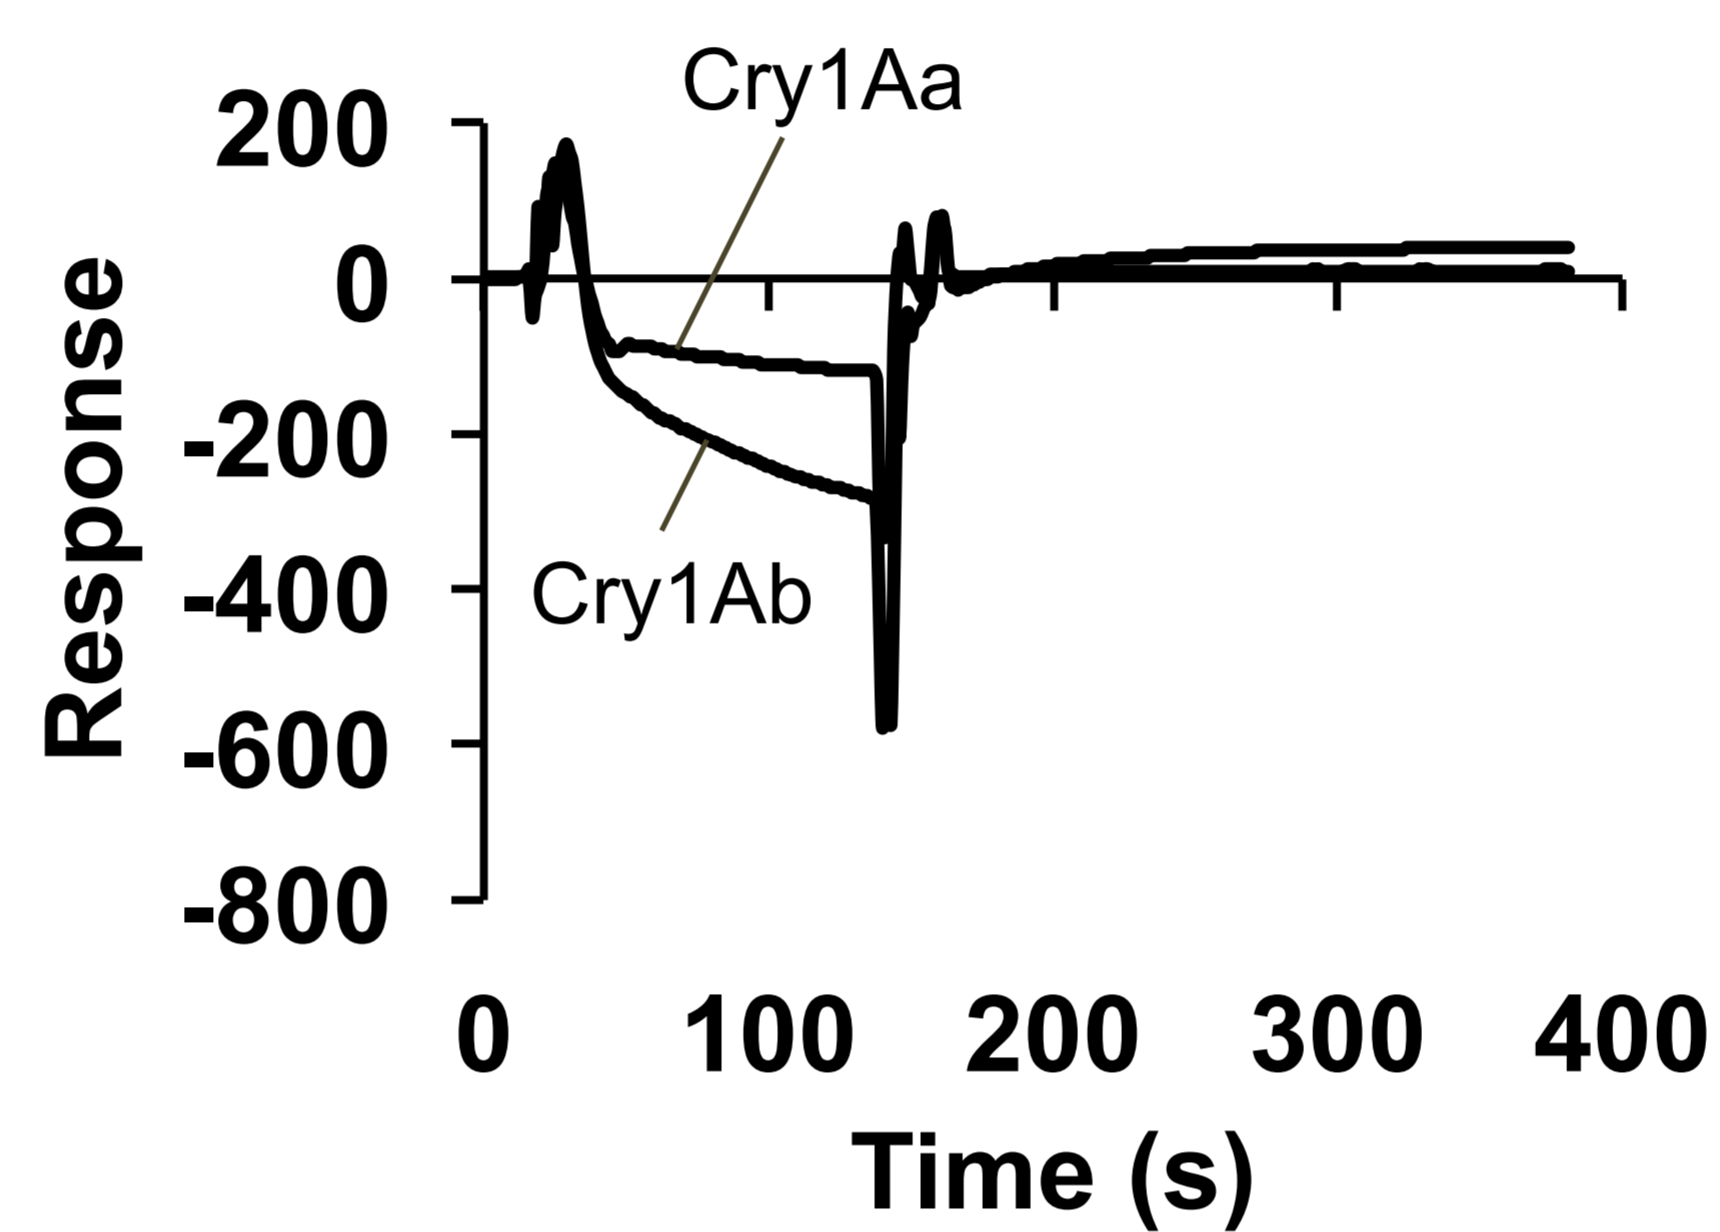

**Figure S1. Binding analysis of Cry1A toxins to contaminating proteins from EGFP-expressing Sf9 cells.** Membrane proteins from EGFP-expressing Sf9 cells (2L culture) were incubated with an anti-FLAG-tag-antibody-conjugated gel and proteins which non-specifically bound the gel were collected and immobilized on a CM5 sensor chip. 400 nM Cry1Aa and Cry1Ab toxins were injected over the sensor chip of Biacore J as analytes.

1:1 Langmuir binding model  
 $A + B \rightleftharpoons AB$

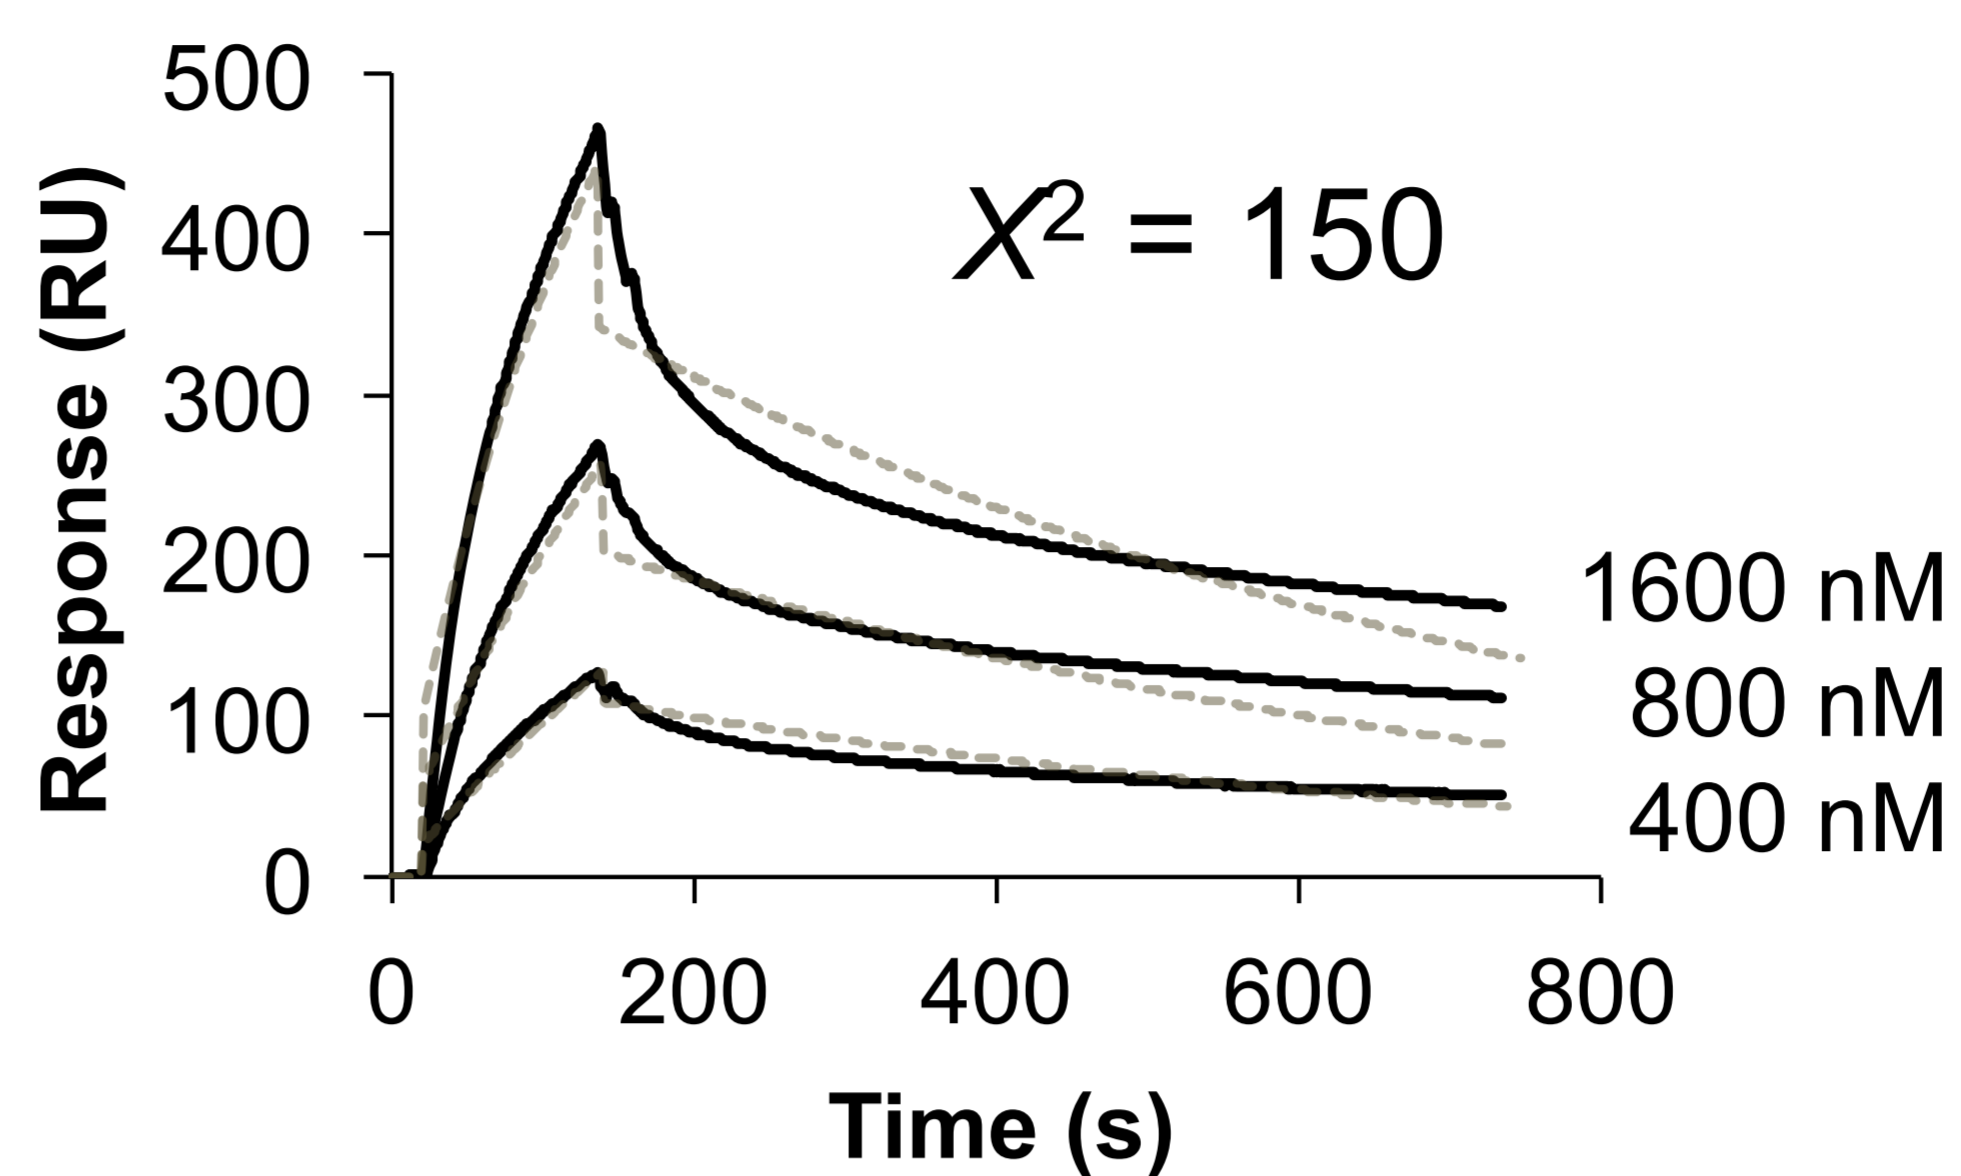

Two-state reaction  
(conformational change)  
 $A + B \rightleftharpoons AB \rightleftharpoons AB^*$

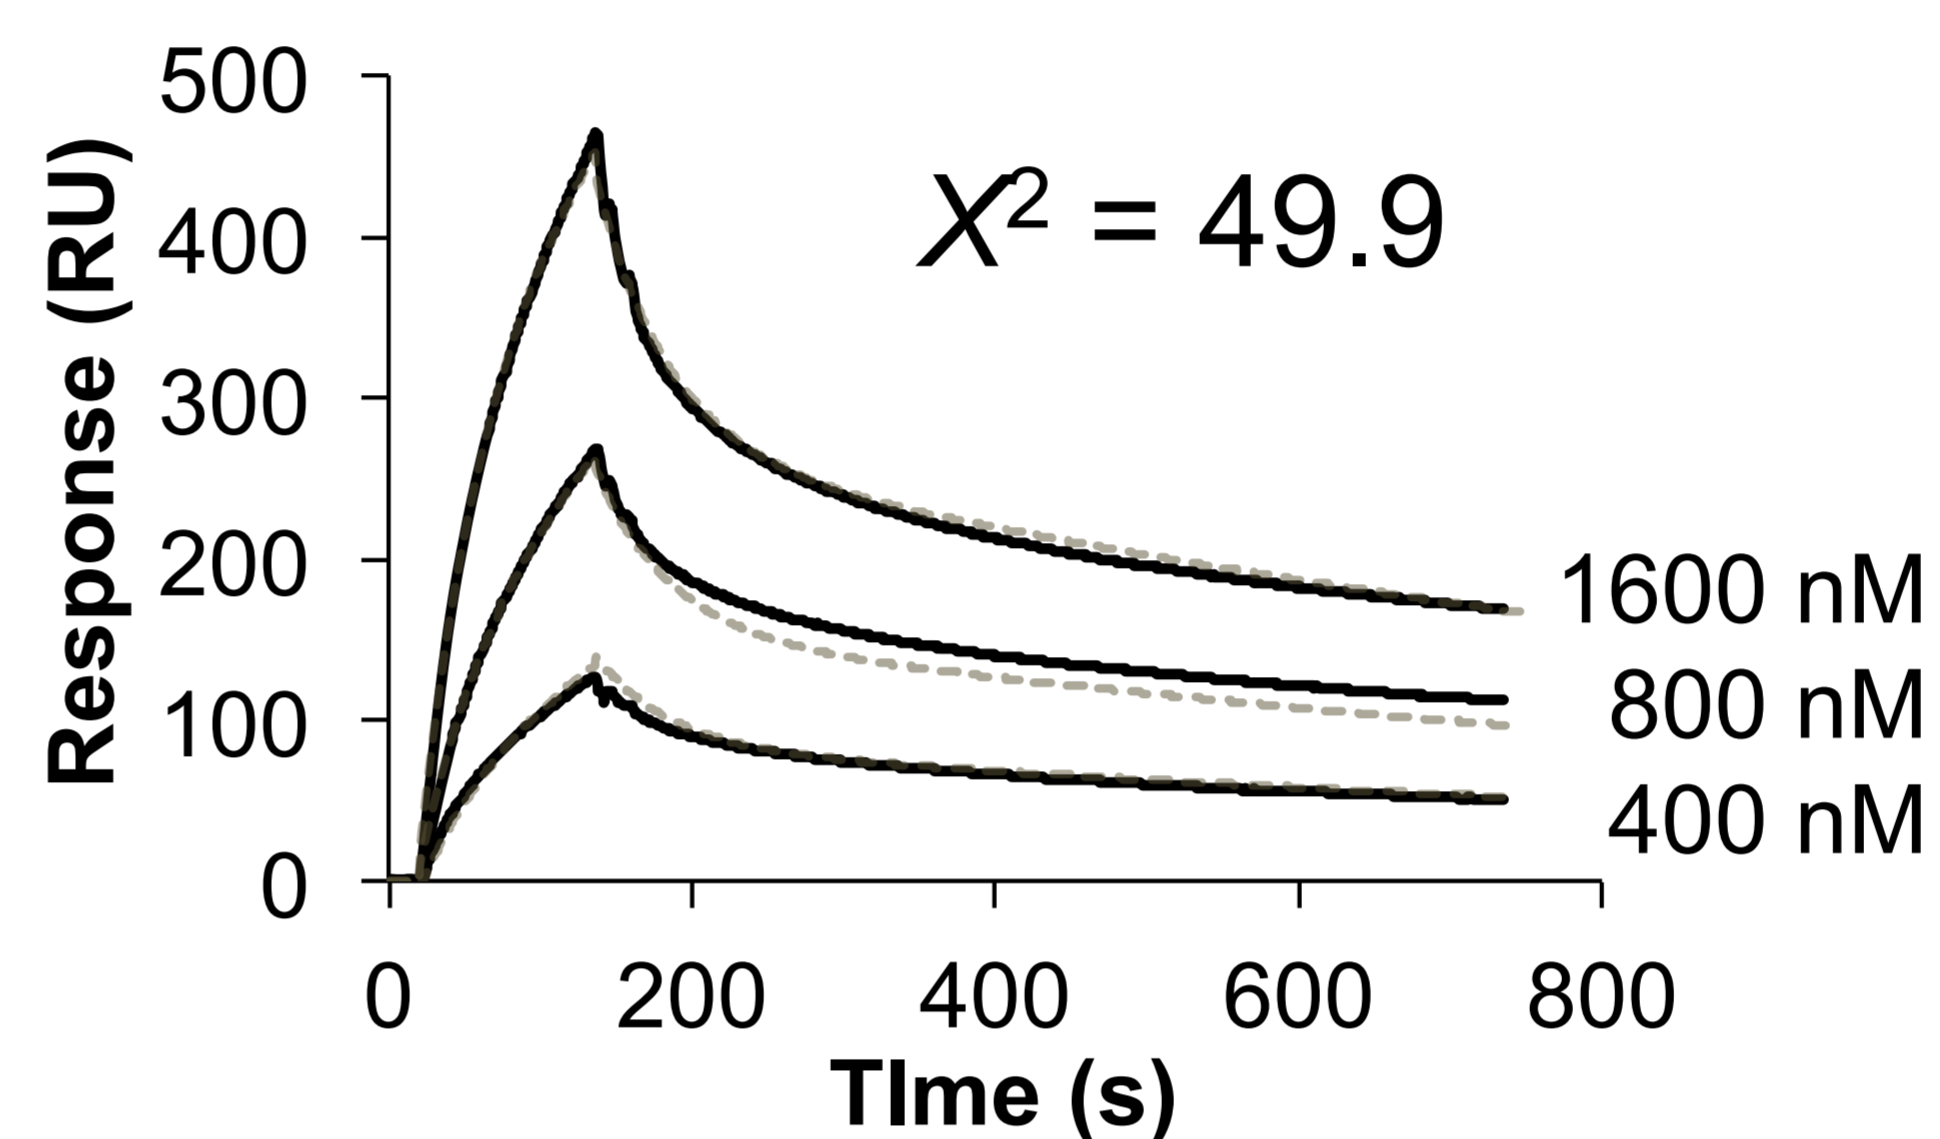

Bivalent binding model  
 $2A + B \rightleftharpoons AB + A \rightleftharpoons AAB$

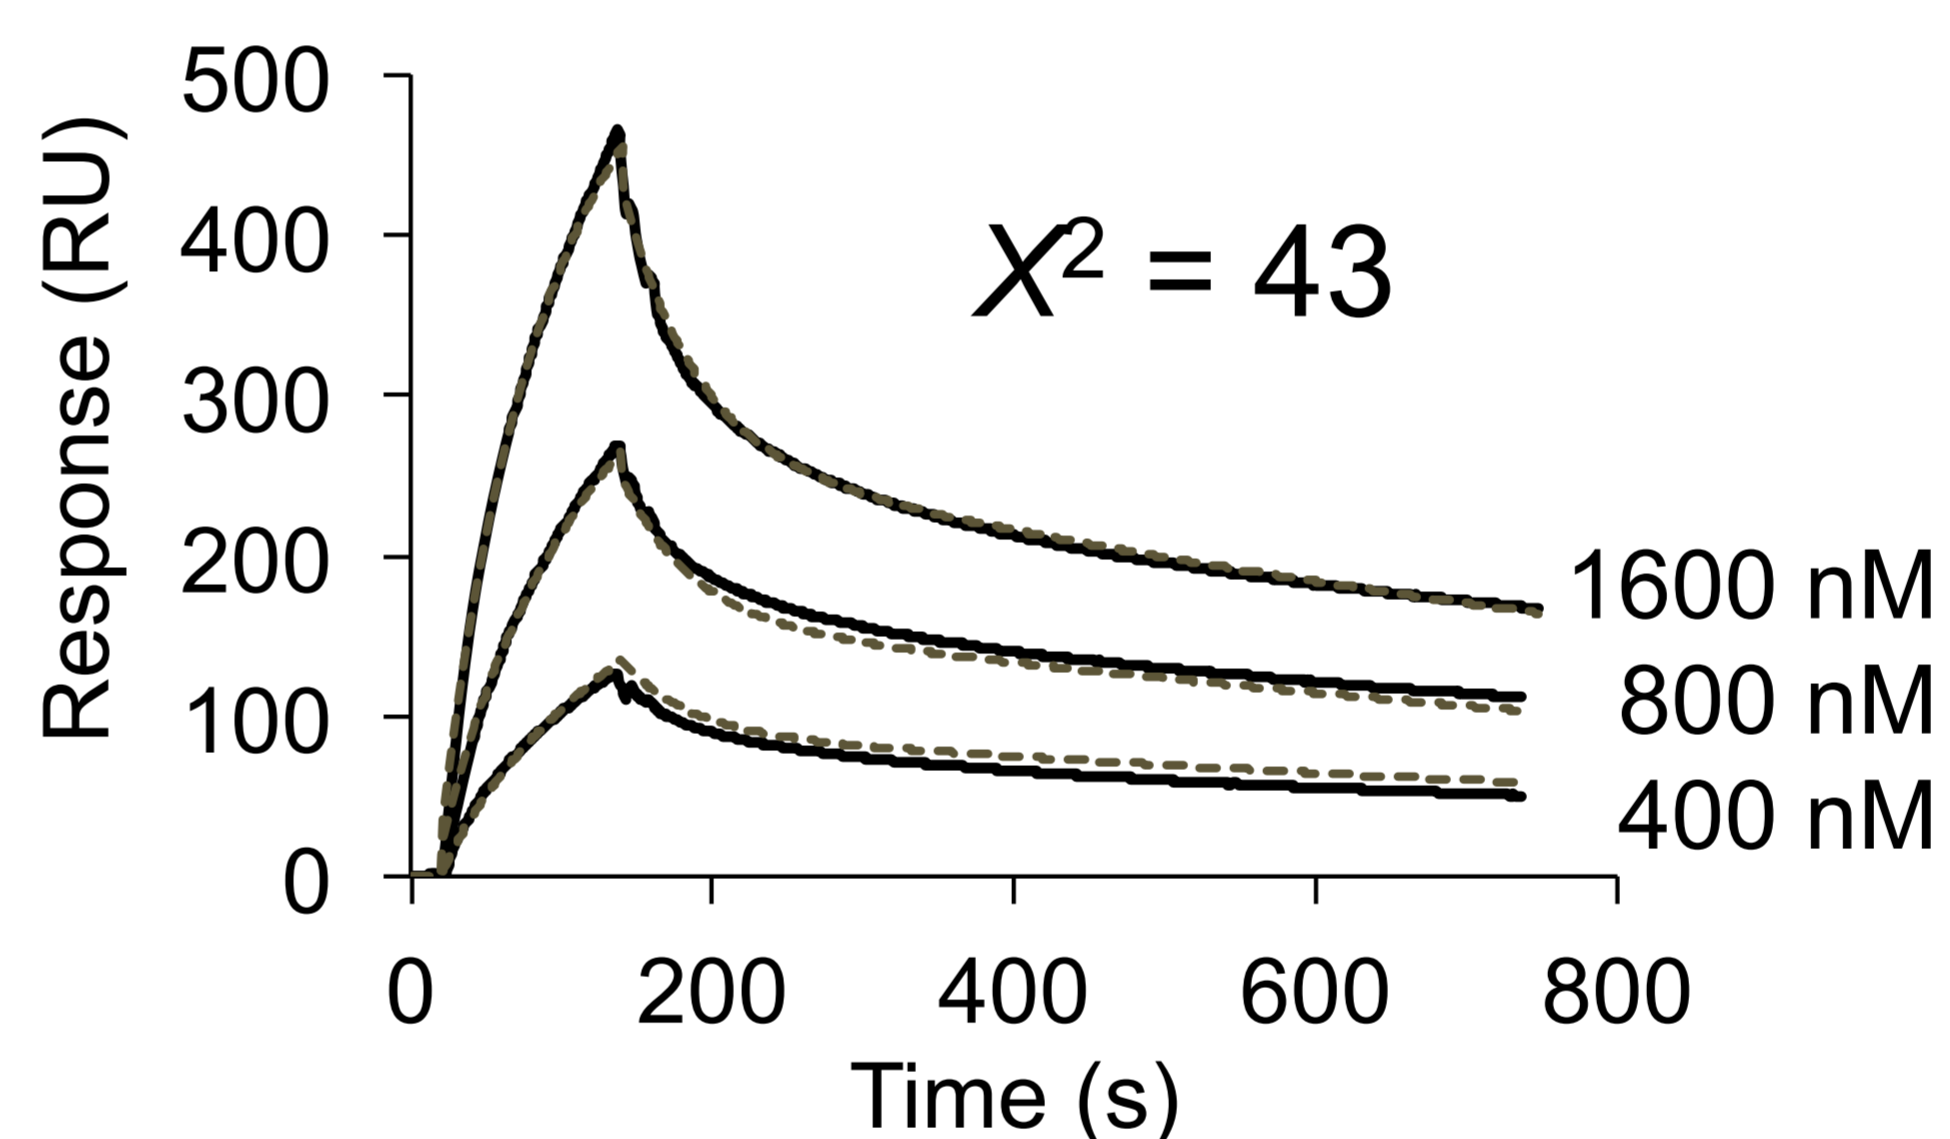

**Figure S2. Curve fitting of the sensorgram displaying the binding response between the Cry1Aa toxin and BmABCC3-FLAG.** Purified BmABCC3 was immobilized on a CM5 sensorchip of Biacore; 400, 800, and 1600 nM Cry1Aa toxins were applied, respectively. The thick black lines indicate the actual response curves, and the thin gray dotted lines show fitting curves based on binding models.  $X^2$  indicates the chi-square value.

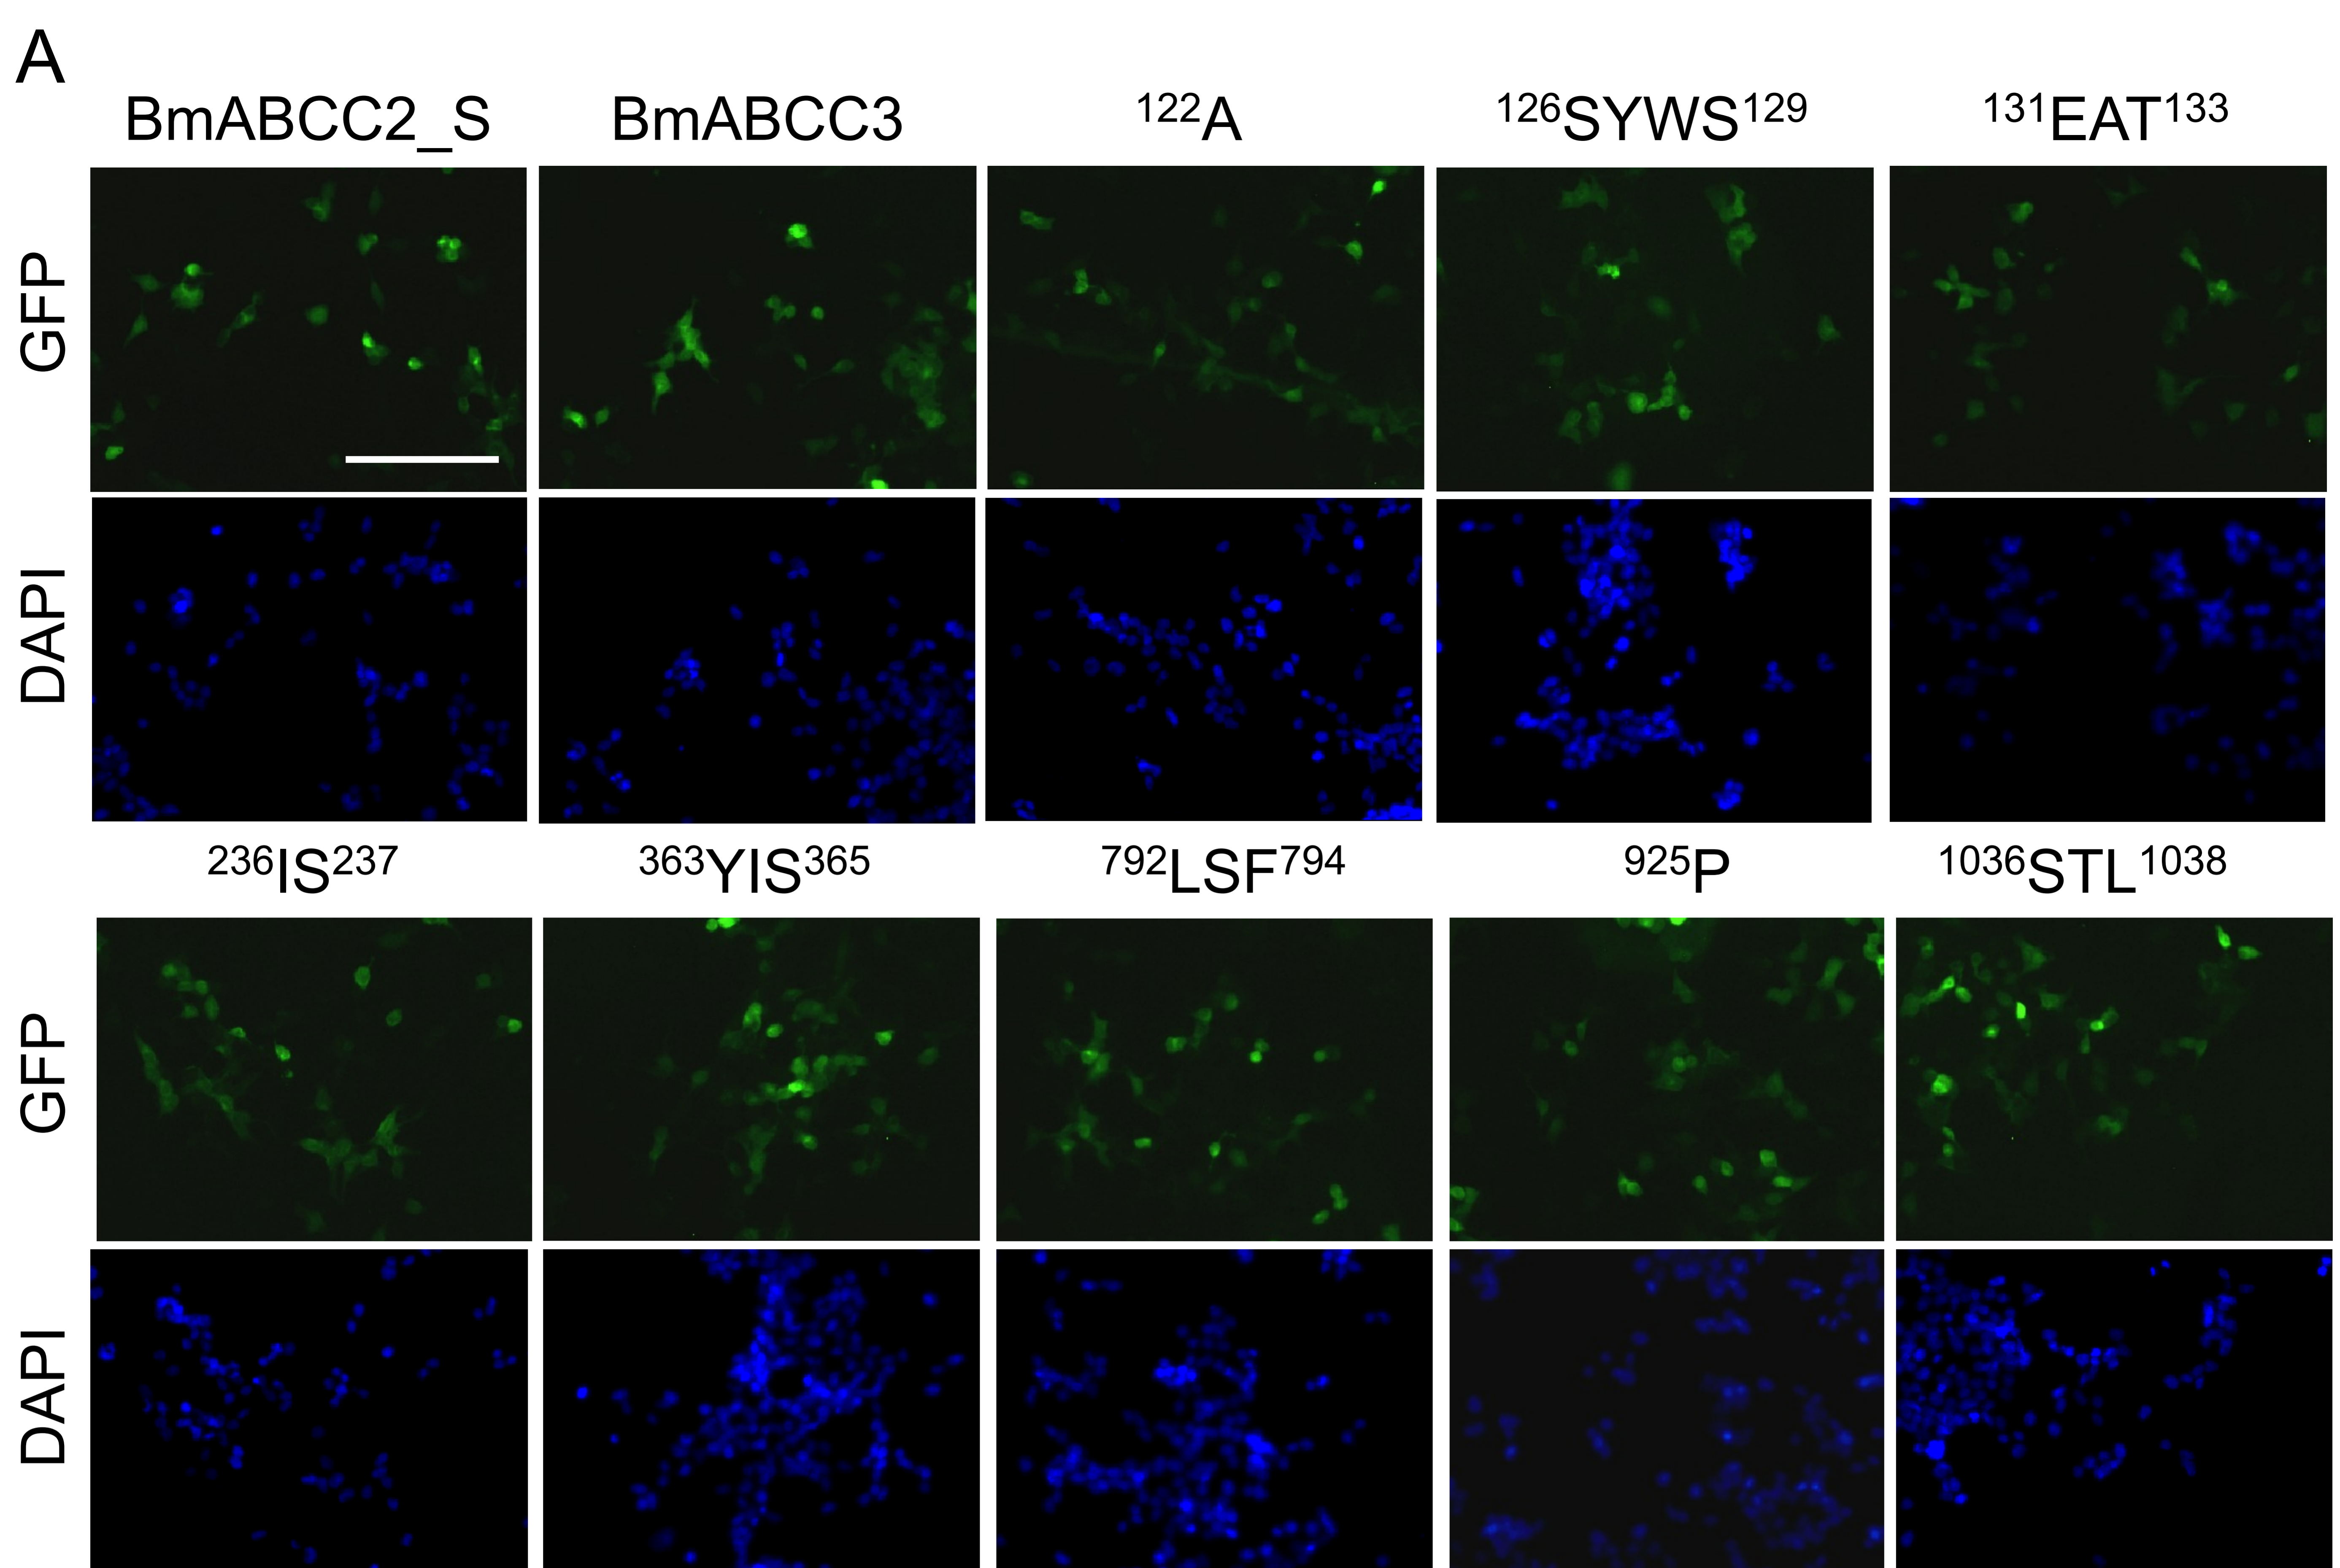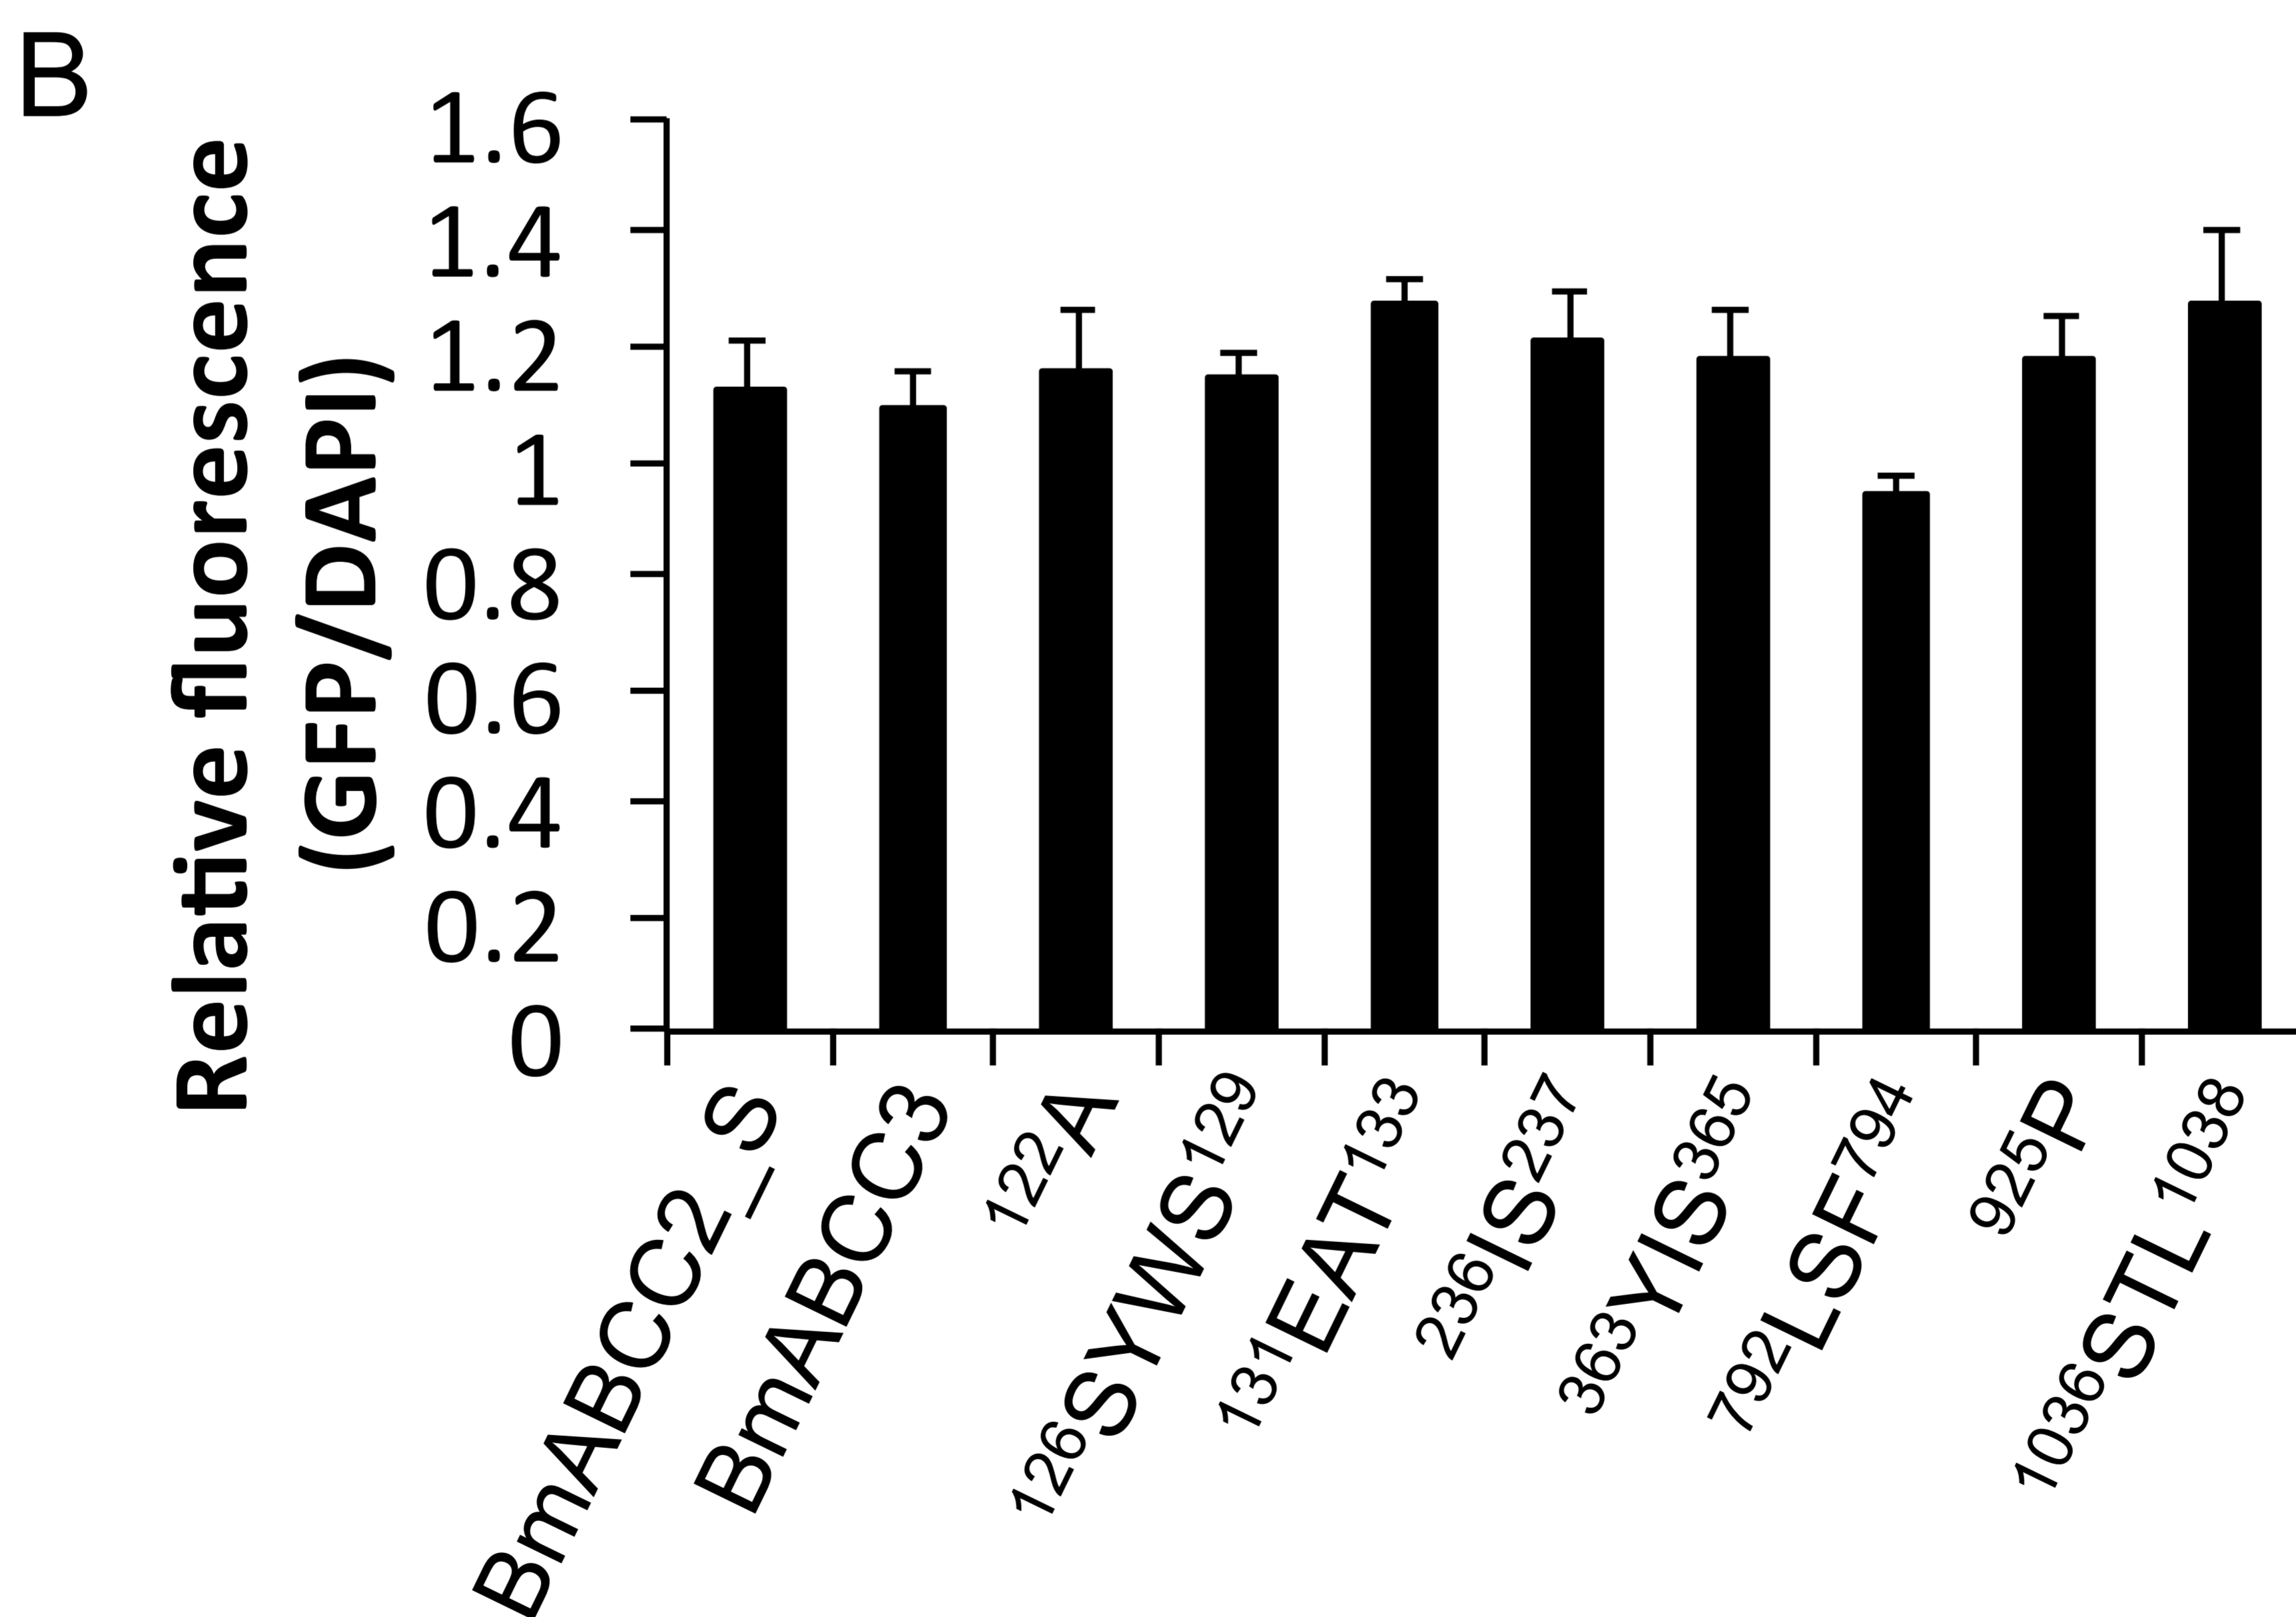

**Figure S3. Expression levels of BmABCC3 mutants in HEK293T cells.** (A) HEK293T cells were transfected with BmABCC3 mutant expression vectors. EGFP, which was fused to the C-termini of the BmABCC3 mutants, and DAPI, which stains nuclear DNA, were visualized under a fluorescence microscope after 48 h as described in the Materials and methods. Scale bar indicates 20  $\mu$ m. (B) The GFP/DAPI ratio indicating the per-cell expression levels of ABCC3 mutants was calculated using the fluorescence intensities of three fields of view, including images in (A). Error bars indicate standard error.

**Table S1. Primers used in this study**

| Purpose                | Name                     | Sequence                                 |
|------------------------|--------------------------|------------------------------------------|
| Human cell expression  | 3.1_BmABC_GFP_F          | ccaccGGATCCGATATGAATAGTGATGGGAGAGC       |
|                        | 3.1_BmABC_GFP_R          | GCTCACCATTTTTCTGTATTTCTACCAA             |
|                        | BmABC_GFP_FLAG_F         | CAGAAAAAATGGTGAGCAAGGGCGAGGA             |
|                        | BmABC_GFP_FLAG_R         | ttgtagtcCTTGTACAGCTCGTCCATGC             |
|                        | GFP_FLAG_3.1_F           | TGTACAAGgactacaaagaccatgacgg             |
|                        | GFP_FLAG_3.1_R           | GAATTCGGTACCGATcttgtcatcgtcatccttgt      |
|                        | BmABCC3_GFentryF         | CCACCCGGATCCGATATGGGTGTTGGAAGTGAAAA      |
|                        | BmABCC3_GFentryR         | GCCCTTGCTCACGATTCTCATGTTTTCTTTTCAGAT     |
| Insect cell expression | BmABCC2_F1               | CGCtctagaATGGACTACAAAGACCATG             |
|                        | BmABCC2_R1               | TCATGGTCTTTGTAGTCCATTTTTCTGTATTTCTACCAA  |
|                        | BmABCC2_F2               | TTGGTAGAAATACAGAAAAAATGGACTACAAAGACCATGA |
|                        | BmABCC2_R2               | CTAtctagaCTTGTTCATCGTCATCCTTGTAATC       |
|                        | BmABCC3_HindF            | actaagcttATGGGTGTTGGAAGTGAAAA            |
|                        | BmABCC3_XhoR             | actctcgagTCTCATGTTTTCTTTTCAGAT           |
| BmABCC3 mutants        | BmABCC3_EAT_inverseF     | ACAGTGGAAGCGACTATTACGCAAATGGAAGCGGT      |
|                        | BmABCC3__EAT_inverseR    | CGTAATAGTCGCTTCCACTGTCCAATACGTGAGCA      |
|                        | BmABCC3_LSF_inverseF     | TACTGGCTCAGTTTCTGGACGAATGCAATGGCA        |
|                        | BmABCC3_LSF_inverseR     | CGTCCAGAACTGAGCCAGTAGTCAGCGCCAGC         |
|                        | BmABCC3_AELL_inverseF    | TGTTATTTgcaGAGCTGCTCACGTATTGGACAGT       |
|                        | BmABCC3_AELL_inverseR    | AGCTCtgcAAATAACAGAGGTGTTATAATACGTAA      |
|                        | BmABCC3_SYWS_inverseF    | CTCtCGTATTGGtCAGTGGATCCGCCTATTACGC       |
|                        | BmABCC3_SYWS_inverseR    | CTGaCCAATACGaGAGCAGCTCTCCAATAACAG        |
|                        | BmABCC3_ECL2IS_inverseF  | GGCTACaTTtAGCTGGTGTGTCAGCTCT             |
|                        | BmABCC3_ECL2IS_inverseR  | ACCAGCTgaAAAtGTAGCCCAGATAGCAGACAG        |
|                        | BmABCC3_ECL3YIS_inverseF | AACAATaCATcAgCGCTGCACAACTCAATATCACA      |
|                        | BmABCC3_ECL3YIS_inverseR | AGCGCTGATGTATTGTTGTAAGGGATAAATCACAG      |
|                        | BmABCC3_ECL5Y_inverseF   | TCGCACTGccTTGGACATTGATTCTTCTGT           |
|                        | BmABCC3_ECL5Y_inverseR   | AATGTCCAaggCAGTGCGATTGCGTTCAA            |
|                        | BmABCC3_ECL6STL_inverseF | GACTTTaGTAcCcTCATTGCCGTGGGAAGTG          |
|                        | BmABCC3_ECL6STL_inverseR | GAgGgTACTAAAGTCTATAAAGATGAACACTAAAATAAC  |
| qPCR                   | BmABCC2_RTF              | TCTTGCCATTGCAAGTTTGTCT                   |
|                        | BmABCC2_RTR              | AGCGATGCCTTGTTGTTGA                      |
|                        | BmABCC3_RTF              | ATTGATGCCTGCTGGTTCGAA                    |
|                        | BmABCC3_RTR              | ACGTTTTACCAGATTGTTGCTA                   |
|                        | ActinA3_RTF              | CGTACCACCGGTATCGTGCT                     |
|                        | ActinA3_RTR              | GAGGATCTTCATGAGGTAGTCGGTC                |

**Table S2. Kinetic parameters of Cry toxins to silkworm ABC transporters**

| Cry toxin         | Cry1Aa                |                       |                       | Cry1Ab                |                       |                       | Cry1Ca                |                       |                       | Cry1Da                |                       |                       | Cry3Bb  |           |         |
|-------------------|-----------------------|-----------------------|-----------------------|-----------------------|-----------------------|-----------------------|-----------------------|-----------------------|-----------------------|-----------------------|-----------------------|-----------------------|---------|-----------|---------|
|                   | BmABCC2_S             | BmABCC3               | BmABCC2_S_BmABCC3     | BmABCC2_R             | BmABCC2_S             | BmABCC3               | BmABCC2_R             | BmABCC2_S             | BmABCC3               | BmABCC2_S             | BmABCC3               | BmABCC2_S             | BmABCC3 | BmABCC2_S | BmABCC3 |
| <i>ka1</i> (1/Ms) | $3.24 \times 10^4$    | $6.46 \times 10^3$    | $4.54 \times 10^4$    | $4.36 \times 10^4$    | $4.44 \times 10^3$    | $1.77 \times 10^4$    | $2.34 \times 10^4$    | $7.71 \times 10^3$    | $2.52 \times 10^2$    | $1.01 \times 10^1$    | $2.83 \times 10^3$    | $5.33 \times 10^2$    |         |           |         |
| <i>kd1</i> (1/s)  | $5.94 \times 10^{-3}$ | $1.07 \times 10^{-2}$ | $1.08 \times 10^{-2}$ | $7.06 \times 10^{-3}$ | $1.41 \times 10^{-5}$ | $1.15 \times 10^{-2}$ | $2.10 \times 10^{-2}$ | $2.81 \times 10^{-2}$ | $1.80 \times 10^{-2}$ | $1.96 \times 10^2$    | $7.95 \times 10^2$    | $1.61 \times 10^{-2}$ |         |           |         |
| <i>ka2</i> (1/s)  | $5.47 \times 10^{-3}$ | $6.36 \times 10^{-3}$ | $2.19 \times 10^{-3}$ | $1.91 \times 10^{-3}$ | $9.48 \times 10^{-4}$ | $1.27 \times 10^{-2}$ | $2.23 \times 10^{-3}$ | $7.89 \times 10^{-3}$ | $3.01 \times 10^{-3}$ | $3.66 \times 10^{-3}$ | $7.64 \times 10^{-4}$ | $2.12 \times 10^{-3}$ |         |           |         |
| <i>kd2</i> (1/s)  | $1.30 \times 10^{-5}$ | $1.16 \times 10^{-3}$ | $2.60 \times 10^{-6}$ | $3.06 \times 10^{-6}$ | $1.00 \times 10^{-5}$ | $4.87 \times 10^{-4}$ | $5.25 \times 10^{-4}$ | $9.52 \times 10^{-4}$ | $1.01 \times 10^{-4}$ | $1.00 \times 10^{-3}$ | $1.78 \times 10^{-3}$ | $2.80 \times 10^{-6}$ |         |           |         |

**Table S3. Kinetic parameters of Cry toxins to ABCC3 mutants**

| Cry toxin         | Cry1Aa                                 | Cry1Ab                                 | Cry1Aa                                 | Cry1Ab                                 |
|-------------------|----------------------------------------|----------------------------------------|----------------------------------------|----------------------------------------|
| Mutants           | ECL1 <sup>129</sup> EAT <sup>131</sup> | ECL1 <sup>129</sup> EAT <sup>131</sup> | ECL3 <sup>363</sup> YIS <sup>365</sup> | ECL3 <sup>363</sup> YIS <sup>365</sup> |
| <i>ka1</i> (1/Ms) | $4.01 \times 10^4$                     | $2.22 \times 10^3$                     | $2.16 \times 10^4$                     | $6.15 \times 10^3$                     |
| <i>kd1</i> (1/s)  | $5.11 \times 10^{-3}$                  | $3.04 \times 10^{-2}$                  | $1.77 \times 10^{-2}$                  | $2.68 \times 10^{-2}$                  |
| <i>ka2</i> (1/s)  | $6.36 \times 10^{-3}$                  | $2.18 \times 10^{-3}$                  | $6.46 \times 10^{-3}$                  | $7.57 \times 10^{-4}$                  |
| <i>kd2</i> (1/s)  | $2.67 \times 10^{-4}$                  | $4.73 \times 10^{-6}$                  | $1.37 \times 10^{-3}$                  | $1.88 \times 10^{-4}$                  |
